## Relationship between Retinal Vessels and OCT-Derived Retinal Neural Parameters

Mayinuer Yusufu<sup>1,2</sup>, Robert N. Weinreb<sup>3</sup>, Mengtian Kang<sup>4</sup>, Algis J. Vingrys<sup>1,5</sup>, Xianwen Shang<sup>1,2,6</sup>,  
Lei Zhang<sup>1,7</sup>, Danli Shi<sup>8,9,10</sup>, Mingguang He<sup>8,9,10</sup>

1. Centre for Eye Research Australia, Royal Victorian Eye and Ear Hospital, East Melbourne, Australia
2. Department of Surgery (Ophthalmology), The University of Melbourne, Melbourne, Australia
3. Hamilton Glaucoma Center, Viterbi Family Department of Ophthalmology and the Shiley Eye Institute, University of California San Diego, La Jolla, California, USA.
4. Beijing Tongren Eye Center, Beijing Tongren Hospital, Capital Medical University, Beijing, 100730, China
5. Department of Optometry & Visions Sciences, The University of Melbourne, Melbourne, Australia
6. Guangdong Eye Institute, Department of Ophthalmology, Guangdong Provincial People's Hospital, Guangdong Academy of Medical Sciences, Guangzhou, 510080, China
7. Central Clinical School, Faculty of Medicine, Nursing and Health Sciences, Monash University, Melbourne, Australia
8. School of Optometry, The Hong Kong Polytechnic University, Kowloon, Hong Kong SAR, China
9. Research Centre for SHARP Vision, The Hong Kong Polytechnic University, Kowloon, Hong Kong SAR
10. Centre for Eye and Vision Research (CEVR), 17W Hong Kong Science Park, Hong Kong SAR.

### Co-corresponding authors

Dr. Xianwen Shang, [xianwen.shang@unimelb.edu.au](mailto:xianwen.shang@unimelb.edu.au)

Dr. Danli Shi, [danli.shi@polyu.edu.hk](mailto:danli.shi@polyu.edu.hk)

### Correspondence to:

Prof. Mingguang He, 11 Yuk Choi Rd Hung Hom, KLN, Hong Kong. e-mail:  
[mingguang.he@polyu.edu.hk](mailto:mingguang.he@polyu.edu.hk)

## Abstract

**Objective:** To investigate structural relationships between retinal vasculometry derived from color fundus photography (CFP) and neural parameters obtained from Optical Coherence Tomography (OCT) scans and validate their causal relationships.

**Design:** Cross-sectional study

**Participants:** Participants with fundus photographs data and OCT data in the UK Biobank cohort study

**Methods:** We used the Retina-based Microvascular Health Assessment System (RMHAS) to extract retinal vascular measurements in the 6\*6mm area centered on the macular region. OCT parameters were available from the UK Biobank. First, pairwise correlations between individual retinal layers and vascular parameters were investigated. Canonical correlation analysis (CCA) was then used to examine associations between sets of variables. Lastly, bidirectional two-sample Mendelian randomization was employed to investigate potential causal relationships.

**Main Outcome Measures:** Measurements of retinal vascular network and neural layers

**Results:** Data from 67,918 eyes of 43,029 participants were included. The Ganglion Cell-Inner Plexiform Layer (GC-IPL) thickness showed the strongest correlations with vascular Density and Complexity ( $r=0.199$  for arterial Vessel Area Density and  $r=0.175$  for Number of Segments). The Inner Nuclear Layer (INL) thickness showed positive correlations with Width ( $r=0.122$ ) and Vessel Area Density (artery) ( $r=0.127$ ). Mendelian randomization analysis indicated bidirectional causal relationships between retinal vascular features and layer thicknesses. Genetically predicted higher Vessel Density was associated with increased thickness across various retinal layers, with the strongest effect on Inner Segment/Outer Segment + Photoreceptor Segment thickness (standardized effect size 1.50,  $p<0.001$ ). Genetically predicted increases in retinal layer thicknesses, particularly the Outer Plexiform Layer, were linked to higher Vessel Density (standardized effect size 0.45,  $p=0.002$ ) and Fractal Dimension (standardized effect size 0.48,  $p<0.001$ ).

**Conclusions:** The positive associations of macular thickness with vascular Density and Caliber measurements were mainly attributable to their associations with GC-IPL and INL. Multidimensional relationships revealed by CCA revealed a complementary nature between the two sets of parameters, highlighting their value as a composite biomarker. Mendelian Randomization uncovered a bidirectional causal relationship that should provide insights into novel therapeutic approaches targeting both vascular and neuronal components.

## Keywords:

Retinal vascular geometry, Retina-Based Microvascular Health Assessment System, Optical Coherence Tomography, Retinal layer thickness, Color fundus photography

## 1 Introduction

2 The retina, an extension of the central nervous system, offers a unique window into human  
3 physiology. It allows for direct, non-invasive visualization of its vasculature and neural  
4 structures<sup>1,2</sup>, lending itself as a valuable proxy for assessing both ocular and systemic health<sup>3-5</sup>.  
5 For instance, retinal vascular features, including vessel diameter, tortuosity, and branching  
6 patterns, quantified from color fundus photography (CFP), have been associated with  
7 cardiovascular diseases, diabetes, and hypertension<sup>6,7</sup>. Retinal layer measurements such as  
8 retinal nerve fiber layer (RNFL) thickness and ganglion cell-inner plexiform layer (GC-IPL)  
9 thickness derived from Optical Coherence Tomography (OCT) have shown associations with  
10 neurodegenerative diseases like Alzheimer's disease, Parkinson's disease, and multiple  
11 sclerosis<sup>8-10</sup>.

12 While previous studies have explored associations between retinal features and various  
13 systemic conditions, they primarily focused on studying retinal vascular and neural features  
14 separately. There is a gap in our understanding of the relationships between the information  
15 provided by those two modalities. Although the development of artificial intelligence has  
16 empowered their detailed quantification and facilitated the differentiation of subtle retinal  
17 feature alterations,<sup>11,12</sup> there is a paucity of information about detailed associations between  
18 vascular features observed in CFP and neural characteristics measured by OCT.

19 CFP and OCT offer complementary data on vascular and neural health, respectively. Notably,  
20 the functional interplay between retinal vessels and neurons and ganglion cells, known as  
21 neurovascular coupling, plays an essential role in maintaining normal retinal physiology and is  
22 disrupted in many ocular diseases, such as diabetic retinopathy and glaucoma<sup>13,14</sup>, and by  
23 extension, brain function<sup>15</sup>. In addition, their interrelationship could provide a more  
24 comprehensive understanding of retinal physiology and pathology, as well as the underlying  
25 pathophysiology of conditions involving both vascular and neural health. Such insights could  
26 lead to the identification of early composite markers of neurodegeneration and vascular  
27 cognitive impairment, facilitating earlier diagnosis and intervention in conditions such as  
28 Alzheimer's disease<sup>16,17</sup>. Furthermore, it remains unclear which process (vascular or neural  
29 structure changes) precedes the other. One hypothesis posits that nerve damage leads to  
30 reduced energy usage, subsequently causing a decrease in vessel density to match the lowered  
31 metabolic demand<sup>18</sup>. Conversely, it is possible that vascular damage could precede and  
32 contribute to nerve degeneration by compromising blood supply and nutrient delivery to neural  
33 tissues<sup>19</sup>.

34 In the current study, we aim to bridge this gap by (1) investigating structural relationships  
35 between retinal vasculometry, obtained from CFPs using the Retina-based Microvascular Health  
36 Assessment System (RMHAS)<sup>11</sup>, and OCT-derived retinal layer parameters in a large cohort of  
37 participants from the UK Biobank; (2) Unveil the causal relationship between retinal vascular  
38 and neural feature changes through Mendelian Randomization.

39

40

41

## 42 **Methods**

### 43 ***Study design and population***

44 For the correlation analyses in this cross-sectional study, we used unidentifiable data from the  
45 UK Biobank. The UK Biobank study is a large population-based cohort study that enrolled  
46 participants aged 40 to 69 years that was launched in 2006 in the United Kingdom, and  
47 introduced eye examinations in 2009, including CFP<sup>20,21</sup>. The UK Biobank cohort study obtained  
48 ethical approval from the North West Multi-Centre Research Ethics Committee (reference  
49 number 06/MRE08/65).

### 50 ***Inclusion and exclusion criteria***

51 We excluded participants who withdrew their consent or did not have CFPs and/or OCT data.  
52 The quality of the CFPs was assessed with RMHAS, and those classified as “Reject” were  
53 removed<sup>11</sup>. The quality of OCT data was assessed using the quality control indicators obtained  
54 with the Topcon Advanced Boundary Segmentation software<sup>22</sup>. Images with a quality score less  
55 than 45, within the poorest 20% of centration and segmentation uncertainty were excluded.  
56 Lastly, we excluded eyes with conditions that could potentially affect vascular network  
57 quantification or retinal layer thickness measurements. These included intraocular pressure  
58 (IOP) of  $\geq 21$  mmHg or  $\leq 8$  mmHg, self-reported glaucoma, macular degeneration, retinal  
59 diseases, diabetic eye diseases, or history of glaucoma surgery<sup>12</sup>. (Definitions are presented in  
60 Supplementary Table 1)

### 61 ***Retinal vascular Measurements***

62 The retinal vascular parameters were obtained using RMHAS<sup>11</sup> from a 6\*6mm area centered on  
63 the macular region of CFPs. The RMHAS automatedly segmented and quantified 23  
64 measurements of 5 categories: Calibers, Density, Tortuosity, Branching Angle, and Complexity.  
65 Supplementary Table 2 shows the definition of retinal vascular features. Figure 1 shows the  
66 corresponding structure of the retinal vascular network obtained from CFPs and cross-sectional  
67 layers obtained from OCT scans in the 6\*6mm area.

### 68 ***OCT Parameters***

69 OCT images were acquired using spectral domain OCT (Topcon 3D OCT 1000 Mk2, Topcon Inc,  
70 Oakland, NJ, USA), capturing high-resolution, cross-sectional scans of the retina, 6 mm x 6 mm  
71 area centered on the fovea, without pupillary dilation in a dark room setting<sup>23</sup>. OCT parameters  
72 were extracted using Topcon Advanced Boundary Segmentation software<sup>12</sup>. After removing  
73 parameters with more than 30% missing values and keeping only parameters presenting retinal  
74 layer thickness of the 6\*6mm area, we included 9 parameters: macular thickness, RNFL, GC-IPL,  
75 inner nuclear layer (INL), INL-retinal pigment epithelium (RPE), INL-external limiting membrane  
76 (ELM), ELM-inner segment/outer segment (ISOS), ISOS-RPE, and RPE thickness (Figure 1).

### 77 ***Mendelian Randomization***

78 We performed a bidirectional, two-sample Mendelian Randomization to examine further the  
79 potential causal relationship between vascular network features and retinal layer thickness. For  
80 the vascular features, we used single nucleotide polymorphisms (SNPs) of retinal vascular  
81 network features obtained in the UK Biobank<sup>24</sup>. The study<sup>24</sup> provided genome-wide association

82 study (GWAS) data on retinal Vessel Density and Fractal Dimension. For the retinal layer  
83 thickness, we used GWAS data of retinal layer thickness obtained from the Leipzig Research  
84 Centre for Civilization Diseases (LIFE-Adult Study)<sup>25,26</sup>. Details of GWAS studies can be found in  
85 Supplementary Text 1. The baseline of the LIFE-Adult Study was carried out from August 2011  
86 to November 2014 in Leipzig, Germany, focusing on investigating prevalences, early onset  
87 markers, genetic predispositions, and lifestyle determinants of major civilization diseases in  
88 participants aged 40-79<sup>26</sup>.

### 89 **Statistical analysis**

90 To describe baseline characteristics, we summarized continuous variables with mean (standard  
91 deviation [SD]), while categorical variables were presented as counts and percentages. We  
92 removed outliers using the method proposed by Zekayat et al<sup>24</sup>. Parameters with a missing  
93 proportion of > 30% were excluded. Missing values were imputed using Multivariate Imputation  
94 by Chained Equations. To ensure comparability, all measurements were rescaled to the SD unit.

95 We assessed normality of the data distribution was assessed with the Anderson-Darling test.  
96 For the correlation test, we used Pearson correlation if both variables were normally  
97 distributed, otherwise Spearman's rank correlation was used. We generated a heatmap based  
98 on the correlation matrix to assess the pairwise strength and direction of the relationships  
99 between all possible pairs of retinal vessel characteristics and OCT parameters.

100 For broader structural relationships between these two sets of variables, we employed  
101 Canonical Correlation Analysis (CCA). The CCA generates dimensions that are linear  
102 combinations of variables from each set that maximize the correlation between the two sets.  
103 The proportion of variance explained by each canonical dimension was calculated to assess the  
104 relative importance of each dimension in explaining the overall relationship between the two  
105 sets of variables. The scatter plot with a fitted locally estimated scatterplot smoothing (LOESS)  
106 curve and linear regression line illustrated the correlation in the canonical dimensions. A Sankey  
107 diagram was constructed to depict the change in variable importance across canonical  
108 dimensions.

109 For the bidirectional Mendelian Randomization, SNPs with a GWAS-correlated P-value <  $5 \times 10^{-6}$   
110 were selected, and data clumping was performed with the linkage disequilibrium  $r^2$  set at 0.001  
111 and clumping window set at 10000 kb. To ensure the comparability among parameters, the  
112 standardized effect sizes were presented.

113 Additionally, subgroup analyses by sex, age groups, and eye laterality were performed. In this  
114 study, a two-sided significance level of alpha = 0.05 was set for all statistical tests. All analyses  
115 were conducted using R version 4.2.3.

116

117

118

## 119 Results

### 120 *Characteristics of participants*

121 Starting with 502,366 participants, our selection process filtered for those with both CFP and  
122 OCT data but excluded low-quality images and data and eyes with conditions that would affect  
123 the segmentation and quantification of retinal features. Our final cohort was 43,029  
124 participants with 67,918 eyes that had both quality CFP and OCT data.

125 The mean (SD) age of the participants was 55.5 (8.19) years, with a higher proportion of  
126 females (55.6%) than males (44.4%) and males being slightly older than females (55.7 vs 55.3  
127 years,  $p < 0.001$ ). Males had a higher mean body mass index (27.6 vs 26.7 kg/m<sup>2</sup>,  $p < 0.001$ ) and  
128 were more likely to be current or former smokers (47.1% vs 38.2%,  $p < 0.001$ ) compared with  
129 females. Males also reported higher levels of physical activity, with 36.0% in the high category  
130 compared with 30.6% of females ( $p < 0.001$ ). Cardiovascular risk factors showed significant  
131 differences across genders, with males having higher mean SBP (138 vs 133 mmHg,  $p < 0.001$ ),  
132 DBP (83.2 vs 79.8 mmHg,  $p < 0.001$ ), and HbA1c levels (35.8 vs 35.3 mmol/mol,  $p < 0.001$ ).  
133 Females had higher mean high-density lipoprotein (1.63 vs 1.31 mmol/L,  $p < 0.001$ ) and low-  
134 density lipoprotein (3.59 vs 3.51 mmol/L,  $p < 0.001$ ) levels. The prevalence of diabetes (4.9% vs  
135 2.8%,  $p < 0.001$ ) and cardiovascular diseases (29.9% vs 21.3%,  $p < 0.001$ ) was higher in males.  
136 Detailed characteristics of participants stratified by sex can be found in Table 1.

### 137 *Pairwise correlations*

138 Figure 3 illustrates the pairwise correlations between retinal vascular features and the thickness  
139 of retinal layers. Macular thickness had moderate positive correlations with multiple vascular  
140 features, particularly the Density measure. The strongest correlations were observed for Vessel  
141 Area Density (artery) ( $r = 0.161$ ), Vessel Skeleton Density (artery) ( $r = 0.132$ ), and Width ( $r = 0.118$ ).  
142 Similarly, GC-IPL demonstrated even stronger positive correlations with these vascular features,  
143 with the highest correlations observed for Vessel Area Density (artery) ( $r = 0.199$ ), Vessel  
144 Skeleton Density (artery) ( $r = 0.170$ ), and Vessel Skeleton Density (vein) ( $r = 0.152$ ). INL also  
145 showed moderate positive correlations with several vascular features, such as Width ( $r = 0.122$ )  
146 and Vessel Area Density (artery) ( $r = 0.127$ ).

147 GC-IPL showed strong correlations with Complexity measures, such as Number of Segments  
148 ( $r = 0.175$ ) and Number of Branching ( $r = 0.157$ ). Conversely, the Length Diameter Ratio (LDR)  
149 showed negative correlations with multiple retinal layer thicknesses, particularly GC-IPL ( $r =$   
150  $-0.143$ ) and INL ( $r = -0.106$ ). RNFL shows weaker correlations, with the strongest being a modest  
151 positive correlation with Vessel Skeleton Density (artery) ( $r = 0.065$ ). Most correlations were  
152 statistically significant ( $p < 0.001$ ), although the strength of these correlations varied, with most  
153 falling in the weak to moderate range.

### 154 *Canonical Correlation Analysis*

155 Figure 4 shows the main results of CCA. The sharp increase in cumulative variance observed in  
156 the first three dimensions suggests that most of the important relationships between the two  
157 sets of variables are captured. The first canonical dimension explained approximately 43.8% of  
158 the variance in the relationship between retinal vascular and OCT parameters, and subsequent

159 dimensions contributed 29.88%. Taken together, the first three dimensions collectively account  
160 for over 92.02% of the total variance explained.

161 The first canonical dimension showed a moderate positive correlation ( $\rho = 0.265$ ) between  
162 retinal vascular measurements and retinal layer thickness. The correlation coefficients were  
163 0.218 and 0.171 in the second and third dimensions (all  $p < 0.001$ ). In the scatter plots of the  
164 first three canonical dimensions, the LOESS curves largely overlapped with the fitted linear lines,  
165 suggesting predominant linear relationships with merely weak non-linear relationships at the  
166 extremes of the distributions.

167 The Sankey diagram revealed that in the first dimension, the number of segments, GC-IPL  
168 thickness, and INL-RPE thickness appeared to be the most influential variables. The second  
169 dimension showed that Vessel Area Density (artery), Junctional Exponent Deviation (JED), and  
170 INL-ELM thickness are the major contributors. The third and fourth dimensions displayed more  
171 evenly distributed patterns of variable importance, with contributions from parameters such as  
172 vessel width, branching patterns, and various layer thicknesses.

### 173 ***Mendelian Randomization***

174 Table 2 presents the results of bidirectional Mendelian randomization, revealing significant  
175 associations of various retinal layers with Vessel Density and Fractal Dimension. Vessel Density  
176 showed the strongest effect on ISOS + Photoreceptor Segment (ISOS+PS) thickness, with a  
177 standardized effect size of 1.50 (95% CI: 1.07, 1.93;  $p < 0.001$ ). In addition, Vessel Density also  
178 showed significant positive effects on Ganglion Cell Layer (GCL) and Outer Plexiform Layer (OPL)  
179 thicknesses, with standardized effect sizes of 0.50 and 0.57 (both  $p$ -values  $< 0.05$ ). When  
180 examining the effect of layer thickness on Vessel Density, multiple retinal layer thicknesses  
181 exhibited significant effects. OPL thickness demonstrated the largest effect on Vessel Density,  
182 with an effect size of 0.45 (95% CI: 0.16, 0.75,  $p = 0.002$ ). GCC, GCL, ISOS+PS, and INL thicknesses  
183 also significantly positively affected Vessel Density, with effect sizes ranging from 0.27 to 0.40  
184 (all  $p < 0.05$ ). While Mendelian randomization did not demonstrate the effect of Fractal  
185 Dimension on the thickness of layers, the reverse effect was revealed. GCC, GCL, IPL, OPL, and  
186 INL all showed significant effects, with standardized effect sizes ranging between 0.25 and 0.48.

187

188

## 189 Discussion

190 We conducted a comprehensive analysis of the relationships between retinal layer thicknesses  
191 and vascular features in 67,918 eyes of 43,029 participants by evaluating pairwise correlations,  
192 correlations between two sets of parameters, and their genetic influence on each other. The  
193 GC-IPL and INL had the strongest associations with vascular features, including Density,  
194 Complexity, and Caliber measurements; there were stronger correlations with arteries than  
195 veins. The CCA results further revealed multidimensional relationships between the two sets of  
196 parameters, indicating a complementary nature of their relationships. Furthermore, the  
197 Mendelian Randomization analysis provided evidence for positive bidirectional causal  
198 relationships.

199 The pairwise correlation analysis revealed the correlations between macular thickness (mainly  
200 attributable to GC-IPL and INL thickness) and Density, Caliber, and Complexity measurements.  
201 The strongest correlations were found for GC-IPL with Vessel Area Density (artery) and Vessel  
202 Skeleton Density (artery), Number of Segments, and Number of Branching. The Mendelian  
203 Randomization also revealed the effect of Vessel Density on GCL. This suggests that a richer  
204 blood supply in the macular region could support enhanced growth of ganglion cells. Given the  
205 high metabolic demand of ganglion cell bodies and dendrites in the GC-IPL, its thickness is  
206 critically dependent on adequate blood supply<sup>19,27,28</sup>. This also explains the stronger correlation  
207 found for arterial Density parameters compared with venular Density parameters in our study.  
208 Furthermore, as revealed by the bidirectional Mendelian Randomization, genetically  
209 determined thicker ganglion cell complex can result in higher Vessel Density and vice versa.  
210 These findings align with previous research suggesting the intricate bidirectional interaction  
211 between retinal vascular health and blood supply regulation is closely linked to the integrity of  
212 retinal neurons, and neural activity<sup>18,29-31</sup>, providing additional evidence on neurovascular  
213 coupling in the retina in terms of phenotypic morphology and genetics.

214 INL thickness was another layer primarily contributing to the correlations between vascular  
215 features and macular thickness. INL thickness was positively correlated with Width ( $r=0.122$ )  
216 and negatively correlated with LDR ( $r=-0.106$ ). This might indicate that thinner INL was  
217 associated with a narrower diameter and elongated vessels relative to their diameter. Such a  
218 geometric pattern could potentially reflect vascular remodeling in response to altered  
219 metabolic demands or could be an early sign of microvascular dysfunction<sup>32</sup>. Previous studies  
220 have shown that changes in vessel morphology, including alterations in LDR, can be indicative  
221 of various retinal pathologies and systemic conditions such as diabetes and hypertension<sup>33</sup>. In  
222 addition, we found INL was associated with Vessel Area Density. This is consistent with the  
223 findings in a previous study<sup>34</sup>, which proposed the retinal vascular network had a more  
224 important role for the inner retina, while the oxygen and nutrition supply of the outer retina  
225 could rely on the choroid<sup>27</sup>.

226 The CCA revealed that the first three canonical dimensions explained more than 90% of the  
227 variance. The parameters that had strong correlations in the pairwise correlation analysis also  
228 primarily contributed to the correlations between the two sets of parameters. The first  
229 canonical dimension, explaining 43.8% of the variance, showed a moderate positive correlation  
230 ( $\rho = 0.265$ ) between retinal vascular measurements and retinal layer thickness. The moderate



231 strength of the correlation suggests that these two sets of measurements provide  
232 complementary rather than redundant information about retinal health and structure. This is  
233 partially evidenced by a previous study that reported that the combined use of CFP and OCT  
234 biomarkers led to improved performance for predicting late age-related macular degeneration  
235 development<sup>35</sup>. This highlights the value of the retinal vascular and neural layer as a composite  
236 biomarker. Further research should extend the application of grouped retinal vascular and  
237 neural biomarkers to systemic disease prediction. The information obtained on retinal vascular  
238 architecture and neural status especially may be relevant to changes in brain functions<sup>36</sup> and  
239 potentially could serve as early biomarkers.

240 The bidirectional relationships revealed by Mendelian randomization analyses point to shared  
241 genetic influences between retinal vascular features and retinal layer thicknesses. This genetic  
242 overlap suggests common developmental pathways and regulatory mechanisms governing both  
243 vascular and neuronal components of the retina. A previous study reported that genes and  
244 signaling pathways, such as the Norrin signaling pathway mediated by the FZD4/LRP5/TSPAN12  
245 receptor complex, involved in angiogenesis and neurogenesis during retinal development may  
246 have pleiotropic effects, influencing vascular architecture and neuronal layer formation<sup>37</sup>.  
247 Furthermore, the consistent associations across multiple retinal layers and vascular features  
248 indicate that these shared genetic factors may have broad effects on retinal structure and  
249 function. Understanding these shared genetic influences could provide valuable insights into  
250 the pathogenesis of retinal diseases and potentially facilitate the identification of new  
251 therapeutic targets.

252 Our study presents several strengths including large sample size, inclusion of a wide range of  
253 retinal vessel and neural layer features, and the employment of advanced statistical methods  
254 including CCA and Mendelian randomization. The bidirectional relationships suggest the  
255 presence of shared genetic influences and developmental pathways between vascular and  
256 neuronal components of the retina. This knowledge could lead to new therapeutic targets for  
257 conditions affecting both neurological and vascular health.

258 Despite its strengths, our study has some limitations. First, the analyses were performed in the  
259 population with a majority being Caucasians, which may affect the generalizability of the  
260 findings. Additionally, due to the low availability of GWAS data on OCT-derived retinal layers,  
261 we used data from a replication study in LIFE-Adult-study. Therefore, the SNPs included may  
262 not be all SNPs that can be identified in this study population. Additionally, the exclusion of  
263 eyes with IOP  $\geq 21$  mmHg or  $\leq 8$  mmHg may omit eyes at risk for or in the early stages of  
264 glaucoma, particularly those with normal-tension glaucoma. Finally, while the study provides a  
265 comprehensive view of retinal structure-vasculature relationships, it may not capture all the  
266 functional implications of these relationships in terms of visual performance or disease  
267 progression. The clinical implications of these results should be explored in future studies.

268 In conclusion, we revealed that macular thickness was associated with vascular Density and  
269 Caliber measurements. These results are mainly attributable to their associations with GC-IPL  
270 and INL thickness. Additionally, the multidimensional relationships revealed by CCA  
271 demonstrate the complementary nature of the two sets of parameters and highlight their value  
272 as a composite biomarker for both ocular and systemic conditions. Moreover, Mendelian

273 Randomization uncovered a bidirectional relationship between retinal layer thicknesses and  
274 vascular features. This relationship offers insights that may be useful for developing novel  
275 therapeutic approaches targeting both vascular and neuronal components of the retina.

276

277 **Competing interests:**

278 None

279

280 **Funding:**

281 This work was supported by the Global STEM Professorship Scheme (P0046113). The Centre for  
282 Eye Research Australia receives Operational Infrastructure Support from the Victorian State  
283 Government. M.Y. is supported by the Melbourne Research Scholarship established by the  
284 University of Melbourne. The funding source had no role in the design and conduct of the study;  
285 collection, management, analysis, and interpretation of the data; preparation, review, or  
286 approval of the manuscript; and decision to submit the manuscript for publication.

287

288

## References:

1. Erskine L, Herrera E. Connecting the retina to the brain. *ASN Neuro*. 2014;6(6)doi:10.1177/1759091414562107
2. London A, Benhar I, Schwartz M. The retina as a window to the brain-from eye research to CNS disorders. *Nat Rev Neurol*. Jan 2013;9(1):44-53. doi:10.1038/nrneurol.2012.227
3. Liew G, Gopinath B, White AJ, Burlutsky G, Yin Wong T, Mitchell P. Retinal Vasculature Fractal and Stroke Mortality. *Stroke*. Apr 2021;52(4):1276-1282. doi:10.1161/strokeaha.120.031886
4. Fu Y, Yusufu M, Wang Y, He M, Shi D, Wang R. Association of retinal microvascular density and complexity with incident coronary heart disease. *Atherosclerosis*. Sep 2023;380:117196. doi:10.1016/j.atherosclerosis.2023.117196
5. Yusufu M, Chen Y, Dayimu A, et al. Retinal Vascular Measurements and Mortality Risk: Evidence From the UK Biobank Study. *Transl Vis Sci Technol*. Jan 2 2024;13(1):2. doi:10.1167/tvst.13.1.2
6. Tien Yin Wong F, MPH, 1,2,3 Ronald Klein, MD, MPH, 1 James M. Tielsch, PhD, 3,4 Larry Hubbard, MAT, 1 and F. Javier Nieto, MD, PhD 3. Retinal Microvascular Abnormalities and their Relationship with Hypertension, Cardiovascular Disease, and Mortality. 2001;
7. Sasongko MB, Wang JJ, Donaghue KC, et al. Alterations in retinal microvascular geometry in young type 1 diabetes. *Diabetes Care*. Jun 2010;33(6):1331-6. doi:10.2337/dc10-0055
8. Chan VTT, Sun Z, Tang S, et al. Spectral-Domain OCT Measurements in Alzheimer's Disease: A Systematic Review and Meta-analysis. *Ophthalmology*. Apr 2019;126(4):497-510. doi:10.1016/j.ophtha.2018.08.009
9. Satue M, Obis J, Rodrigo MJ, et al. Optical Coherence Tomography as a Biomarker for Diagnosis, Progression, and Prognosis of Neurodegenerative Diseases. *J Ophthalmol*. 2016;2016:8503859. doi:10.1155/2016/8503859
10. Petzold A, Balcer LJ, Calabresi PA, et al. Retinal layer segmentation in multiple sclerosis: a systematic review and meta-analysis. *Lancet Neurol*. Oct 2017;16(10):797-812. doi:10.1016/s1474-4422(17)30278-8
11. Shi D, Lin Z, Wang W, et al. A Deep Learning System for Fully Automated Retinal Vessel Measurement in High Throughput Image Analysis. *Front Cardiovasc Med*. 2022;9:823436. doi:10.3389/fcvm.2022.823436
12. Ko F, Foster PJ, Strouthidis NG, et al. Associations with Retinal Pigment Epithelium Thickness Measures in a Large Cohort: Results from the UK Biobank. *Ophthalmology*. Jan 2017;124(1):105-117. doi:10.1016/j.ophtha.2016.07.033
13. Wareham LK, Calkins DJ. The Neurovascular Unit in Glaucomatous Neurodegeneration. *Front Cell Dev Biol*. 2020;8:452. doi:10.3389/fcell.2020.00452
14. Gardner TW, Davila JR. The neurovascular unit and the pathophysiologic basis of diabetic retinopathy. *Graefes Arch Clin Exp Ophthalmol*. Jan 2017;255(1):1-6. doi:10.1007/s00417-016-3548-y
15. Girouard H, Iadecola C. Neurovascular coupling in the normal brain and in hypertension, stroke, and Alzheimer disease. *J Appl Physiol (1985)*. Jan 2006;100(1):328-35. doi:10.1152/jappphysiol.00966.2005

16. Czako C, Kovacs T, Ungvari Z, et al. Retinal biomarkers for Alzheimer's disease and vascular cognitive impairment and dementia (VCID): implication for early diagnosis and prognosis. *Geroscience*. Dec 2020;42(6):1499-1525. doi:10.1007/s11357-020-00252-7
17. Normando EM, Davis BM, De Groef L, et al. The retina as an early biomarker of neurodegeneration in a rotenone-induced model of Parkinson's disease: evidence for a neuroprotective effect of rosiglitazone in the eye and brain. *Acta Neuropathol Commun*. Aug 18 2016;4(1):86. doi:10.1186/s40478-016-0346-z
18. Pournaras CJ, Rungger-Brändle E, Riva CE, Hardarson SH, Stefansson E. Regulation of retinal blood flow in health and disease. *Prog Retin Eye Res*. May 2008;27(3):284-330. doi:10.1016/j.preteyeres.2008.02.002
19. Iadecola C. The pathobiology of vascular dementia. *Neuron*. Nov 20 2013;80(4):844-66. doi:10.1016/j.neuron.2013.10.008
20. Sudlow C, Gallacher J, Allen N, et al. UK biobank: an open access resource for identifying the causes of a wide range of complex diseases of middle and old age. *PLoS Med*. Mar 2015;12(3):e1001779. doi:10.1371/journal.pmed.1001779
21. Chua SYL, Thomas D, Allen N, et al. Cohort profile: design and methods in the eye and vision consortium of UK Biobank. *BMJ Open*. Feb 21 2019;9(2):e025077. doi:10.1136/bmjopen-2018-025077
22. Patel PJ, Foster PJ, Grossi CM, et al. Spectral-Domain Optical Coherence Tomography Imaging in 67 321 Adults: Associations with Macular Thickness in the UK Biobank Study. *Ophthalmology*. Apr 2016;123(4):829-40. doi:10.1016/j.ophtha.2015.11.009
23. Keane PA, Grossi CM, Foster PJ, et al. Optical Coherence Tomography in the UK Biobank Study - Rapid Automated Analysis of Retinal Thickness for Large Population-Based Studies. *PLoS One*. 2016;11(10):e0164095. doi:10.1371/journal.pone.0164095
24. Zekavat SM, Raghunath VK, Trinder M, et al. Deep Learning of the Retina Enables Phenome- and Genome-Wide Analyses of the Microvasculature. *Circulation*. Jan 11 2022;145(2):134-150. doi:10.1161/circulationaha.121.057709
25. Zekavat SM, Jorshery SD, Rauscher FG, et al. Phenome- and genome-wide analyses of retinal optical coherence tomography images identify links between ocular and systemic health. *Sci Transl Med*. Jan 24 2024;16(731):eadg4517. doi:10.1126/scitranslmed.adg4517
26. Loeffler M, Engel C, Ahnert P, et al. The LIFE-Adult-Study: objectives and design of a population-based cohort study with 10,000 deeply phenotyped adults in Germany. *BMC Public Health*. Jul 22 2015;15:691. doi:10.1186/s12889-015-1983-z
27. Kur J, Newman EA, Chan-Ling T. Cellular and physiological mechanisms underlying blood flow regulation in the retina and choroid in health and disease. *Prog Retin Eye Res*. Sep 2012;31(5):377-406. doi:10.1016/j.preteyeres.2012.04.004
28. Ames A, 3rd. CNS energy metabolism as related to function. *Brain Res Brain Res Rev*. Nov 2000;34(1-2):42-68. doi:10.1016/s0165-0173(00)00038-2
29. Iadecola C. The Neurovascular Unit Coming of Age: A Journey through Neurovascular Coupling in Health and Disease. *Neuron*. Sep 27 2017;96(1):17-42. doi:10.1016/j.neuron.2017.07.030
30. Attwell D, Iadecola C. The neural basis of functional brain imaging signals. *Trends Neurosci*. Dec 2002;25(12):621-5. doi:10.1016/s0166-2236(02)02264-6

31. Attwell D, Buchan AM, Charpak S, Lauritzen M, Macvicar BA, Newman EA. Glial and neuronal control of brain blood flow. *Nature*. Nov 11 2010;468(7321):232-43. doi:10.1038/nature09613
32. Broe R, Rasmussen ML, Frydkjaer-Olsen U, et al. Retinal vessel calibers predict long-term microvascular complications in type 1 diabetes: the Danish Cohort of Pediatric Diabetes 1987 (DCPD1987). *Diabetes*. Nov 2014;63(11):3906-14. doi:10.2337/db14-0227
33. Hughes AD, Wong TY, Witt N, et al. Determinants of retinal microvascular architecture in normal subjects. *Microcirculation*. Feb 2009;16(2):159-66. doi:10.1080/10739680802353868
34. Yu J, Gu R, Zong Y, et al. Relationship Between Retinal Perfusion and Retinal Thickness in Healthy Subjects: An Optical Coherence Tomography Angiography Study. *Invest Ophthalmol Vis Sci*. Jul 1 2016;57(9):Oct204-10. doi:10.1167/iovs.15-18630
35. Wu Z, Bogunović H, Asgari R, Schmidt-Erfurth U, Guymer RH. Predicting Progression of Age-Related Macular Degeneration Using OCT and Fundus Photography. *Ophthalmol Retina*. Feb 2021;5(2):118-125. doi:10.1016/j.oret.2020.06.026
36. Cabrera DeBuc D, Somfai GM, Arthur E, Kostic M, Oropesa S, Mendoza Santiesteban C. Investigating Multimodal Diagnostic Eye Biomarkers of Cognitive Impairment by Measuring Vascular and Neurogenic Changes in the Retina. *Front Physiol*. 2018;9:1721. doi:10.3389/fphys.2018.01721
37. Selvam S, Kumar T, Fruttiger M. Retinal vasculature development in health and disease. *Prog Retin Eye Res*. Mar 2018;63:1-19. doi:10.1016/j.preteyeres.2017.11.001

Figure 1. Two imaging modalities of retina structures

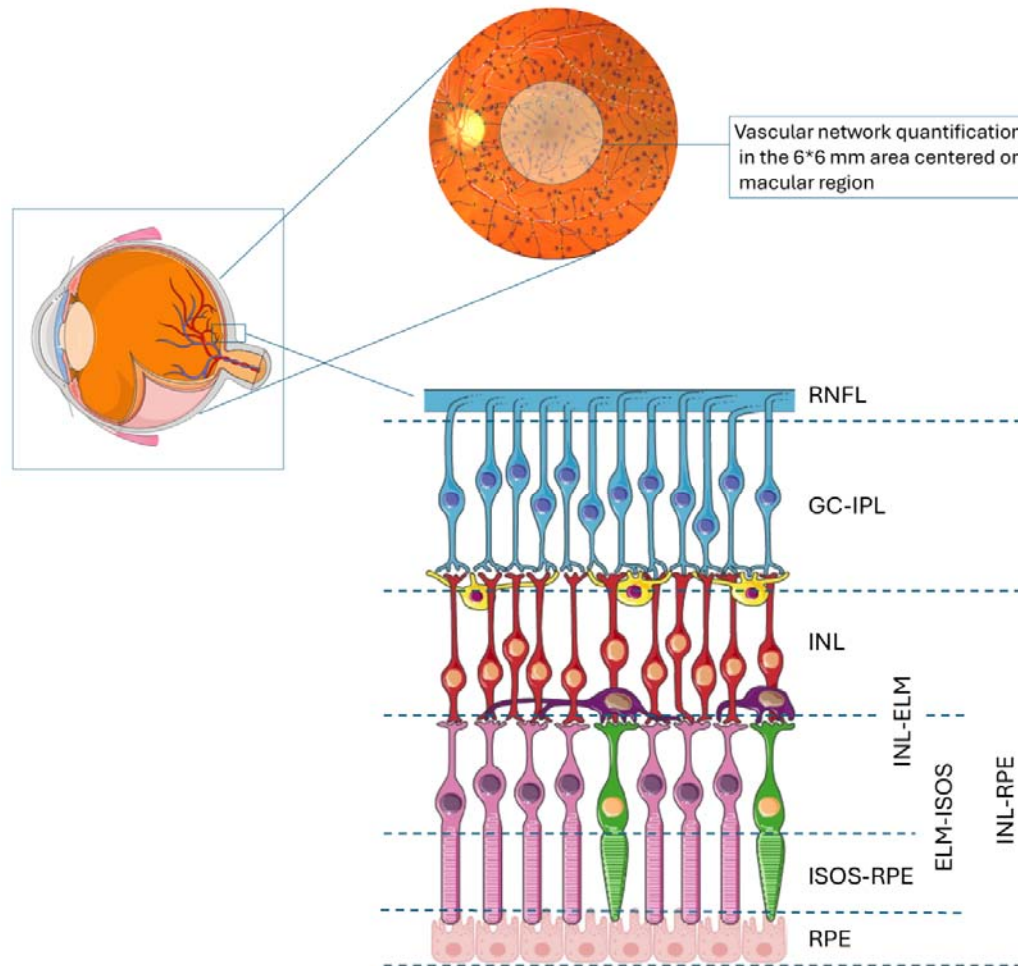

Notes: The figure used images downloaded from the Servier Medical Art [https://smart.servier.com/smart\\_image](https://smart.servier.com/smart_image) and by Sally Kim. (Structure of the Retina.: Biorender; 2020. <https://app.biorender.com/biorender-templates/figures/all/t-5fdb689c542b300a3aeb236-structure-of-the-retina>). Abbreviations: RNFL, retinal nerve fiber layer; GC-IPL, ganglion cell layer-inner plexiform layer; INL, inner nuclear layer; ELM, external limiting membrane; ISOS, inner segment/outer segment; RPE, retinal pigment epithelium.

Figure 2. Participant selection process

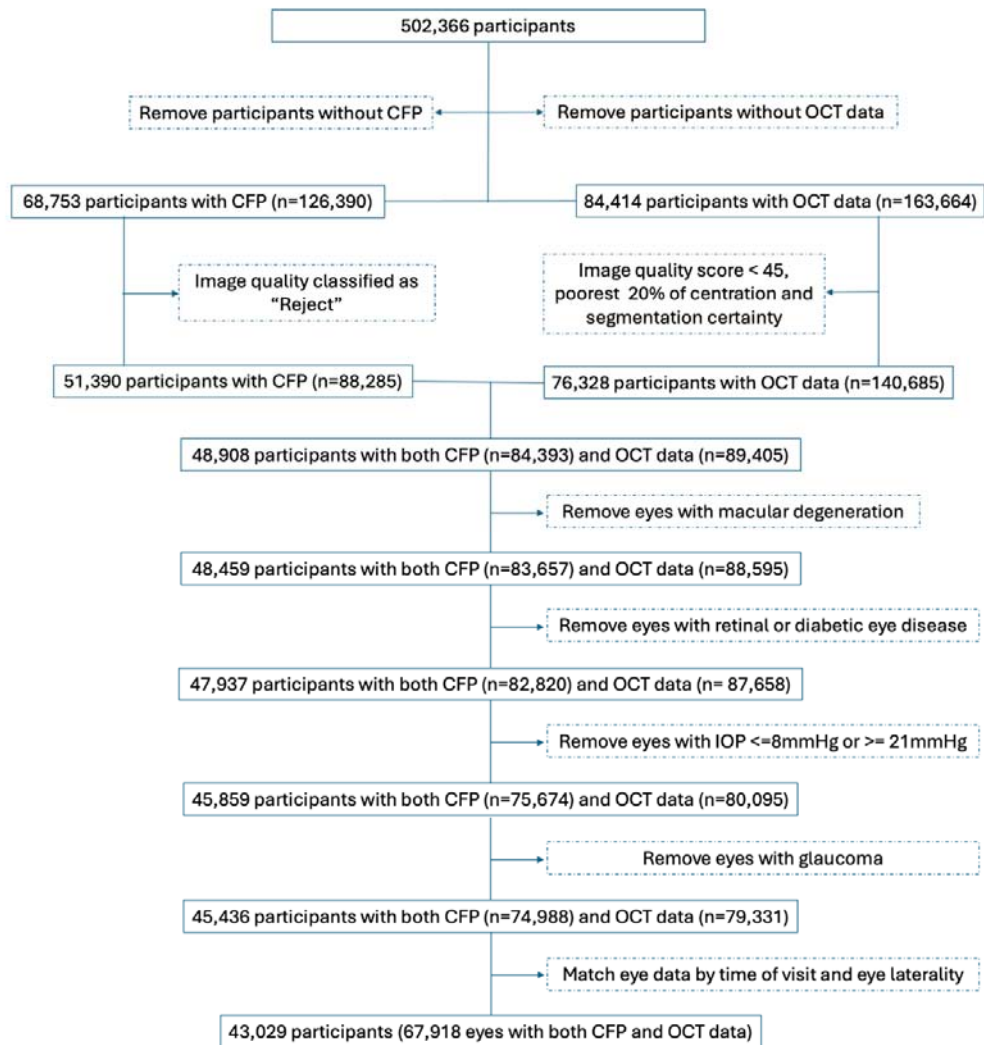

Notes: OCT, Optical Coherence Tomography. CFP, Color Fundus Photograph. Definitions of variables used in the selection process are presented in Supplementary Table 1.

Figure 3 Correlations between retinal vascular features and thickness of retinal layers

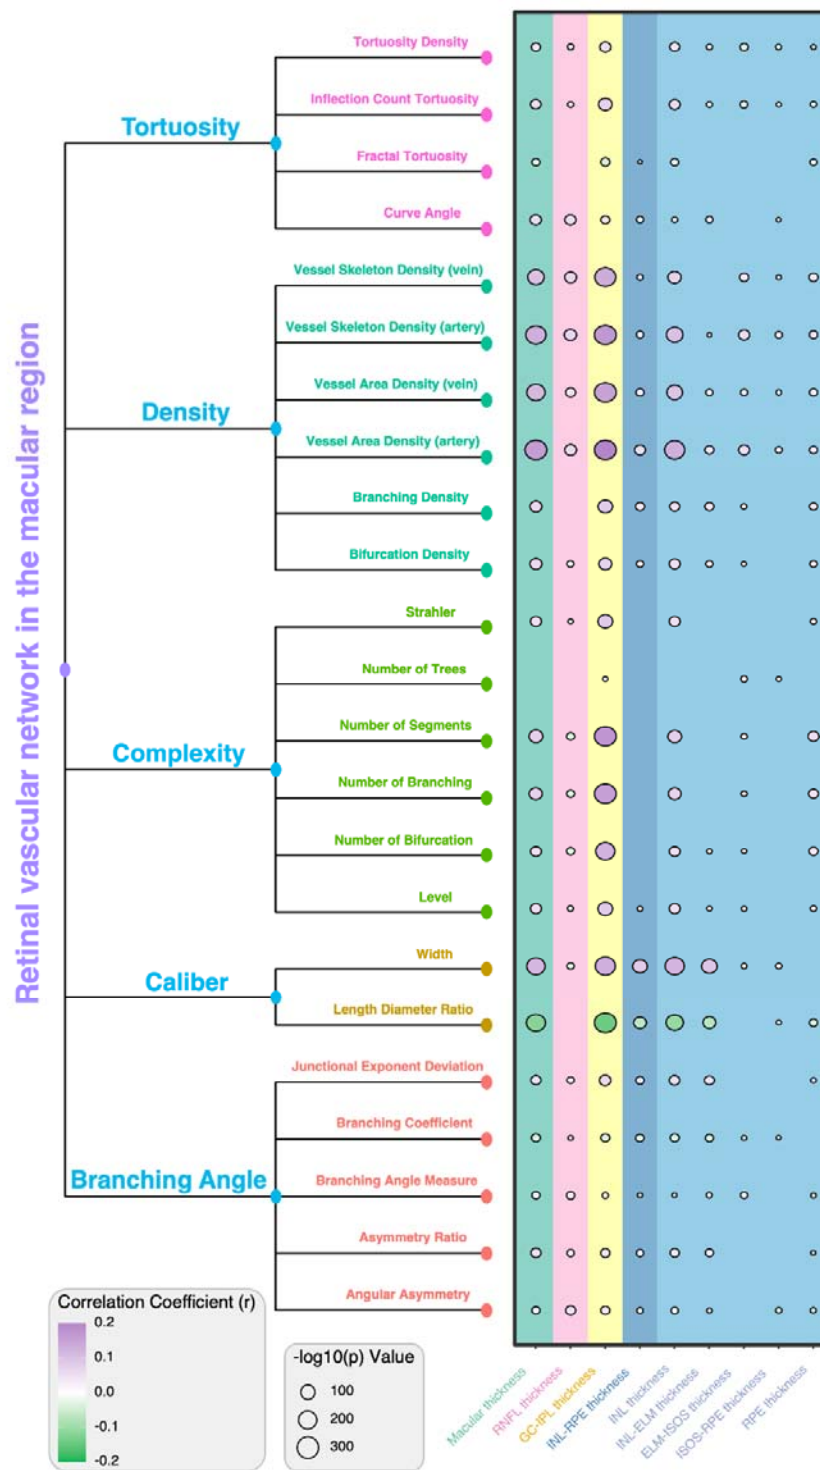

Notes: Circle size represents statistical significance (-log<sub>10</sub>(p) value), while its color indicates the strength and direction of correlation (purple for positive, green for negative). Only those correlations with p<0.05 were



presented with a circle. Abbreviations: RNFL, retinal nerve fiber layer; GC-IPL, ganglion cell-inner plexiform layer; INL, inner nuclear layer; ELM, external limiting membrane; ISOS, inner segment/outer segment; RPE, retinal pigment epithelium. The calculated correlation coefficients and the corresponding p-values can be found in Supplementary Table 3.

Figure 4. Canonical Correlation Analysis (CCA) of Retinal Vascular Measurements and Retinal Layer Thickness

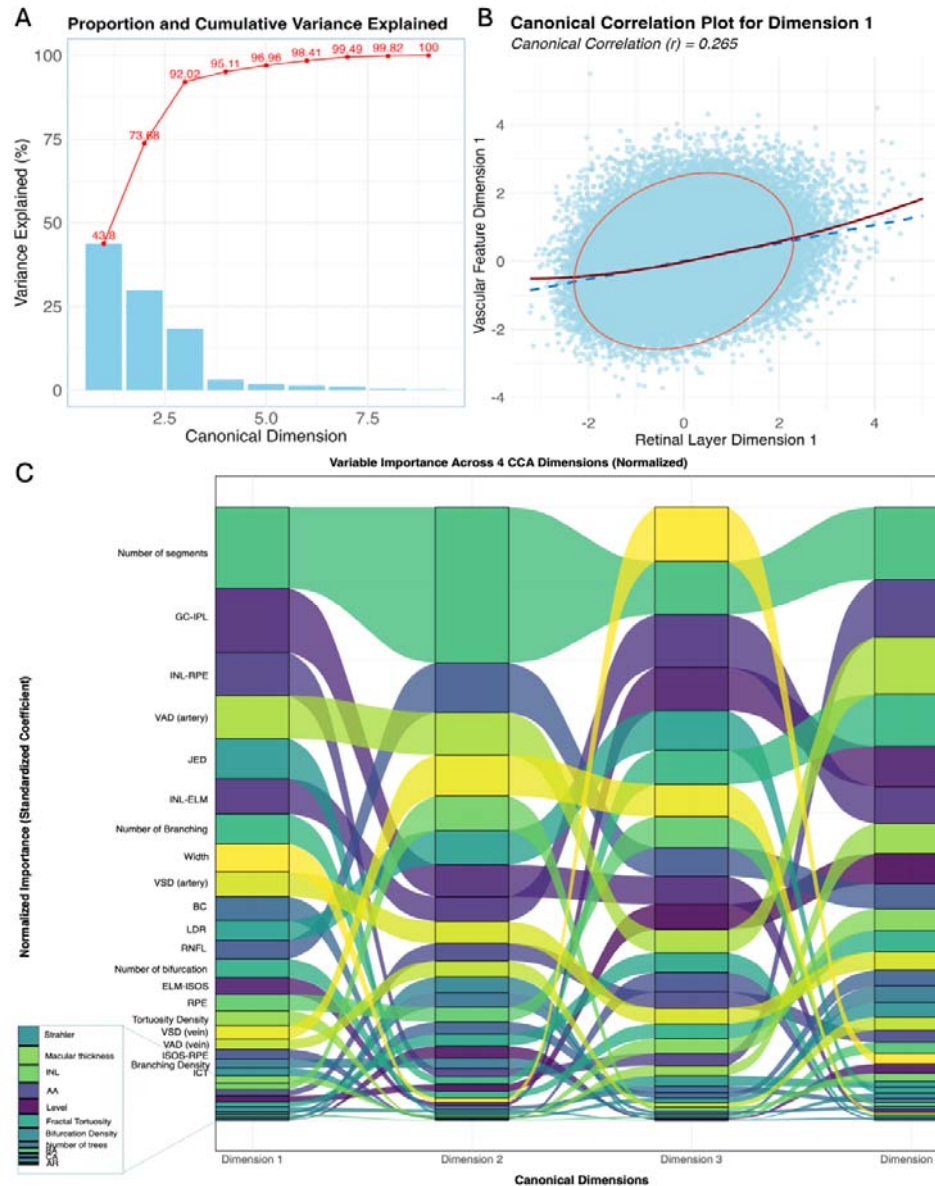

Notes: (A) Variance Explained: The bar chart (blue) shows the proportion of variance explained by each canonical dimension, while the line graph (red) displays the cumulative variance explained. This illustrates the relative importance of each dimension in capturing the relationship between retinal vascular and OCT parameters. The first four dimensions explained over 95% of the variance. (B) First Canonical Dimension Correlation: This scatter plot depicts the correlation between the first canonical variates for retinal vascular measurements (y-axis) and retinal layer thickness (x-axis). The red ellipse outlines the 95% confidence region of the data distribution. The blue dashed line shows the linear regression fit, while the solid red curve represents the locally estimated scatterplot smoothing (LOESS) fit, providing a non-linear visualization of the relationship. The canonical correlation ( $\rho$ ) of 0.265 indicates the strength of the association for this dimension. (C) Variable Importance Across Dimensions: This Sankey diagram illustrates how the importance of different variables (both retinal vascular measurements and OCT

parameters) changed across the first four canonical dimensions. The height of each flow represents the magnitude of a variable's contribution to each dimension, allowing for the visualization of which variables are most influential in each canonical relationship. Supplementary Figures 1 and 2 show the correlations of the first four dimensions and the loadings of variables.

Table 1. Baseline characteristics of participants

| Characteristic                                | Whole Sample<br>(N=43029) | Female<br>(N=23917) | Male<br>(N=19112) | P-<br>value |
|-----------------------------------------------|---------------------------|---------------------|-------------------|-------------|
| <b>Age (years)</b>                            |                           |                     |                   | <0.001      |
| Mean (SD)                                     | 55.5 (8.19)               | 55.3 (8.02)         | 55.7 (8.38)       |             |
| <b>Body Mass Index<br/>(kg/m<sup>2</sup>)</b> |                           |                     |                   | <0.001      |
| Mean (SD)                                     | 27.1 (4.69)               | 26.7 (5.09)         | 27.6 (4.10)       |             |
| Missing, N (%)                                | 202 (0.5%)                | 107 (0.4%)          | 95 (0.5%)         |             |
| <b>Smoking Status, N (%)</b>                  |                           |                     |                   | <0.001      |
| Never                                         | 24664 (57.3%)             | 14665 (61.3%)       | 9999 (52.3%)      |             |
| Previous                                      | 14191 (33.0%)             | 7264 (30.4%)        | 6927 (36.2%)      |             |
| Current                                       | 3940 (9.2%)               | 1862 (7.8%)         | 2078 (10.9%)      |             |
| Missing                                       | 234 (0.5%)                | 126 (0.5%)          | 108 (0.6%)        |             |
| <b>Physical Activity, N (%)</b>               |                           |                     |                   | <0.001      |
| Low                                           | 6107 (14.2%)              | 3184 (13.3%)        | 2923 (15.3%)      |             |
| Moderate                                      | 14124 (32.8%)             | 8027 (33.6%)        | 6097 (31.9%)      |             |
| High                                          | 14199 (33.0%)             | 7310 (30.6%)        | 6889 (36.0%)      |             |
| Missing                                       | 8599 (20.0%)              | 5396 (22.6%)        | 3203 (16.8%)      |             |
| <b>Systolic Blood Pressure<br/>(mmHg)</b>     |                           |                     |                   | <0.001      |
| Mean (SD)                                     | 135 (18.0)                | 133 (18.6)          | 138 (16.6)        |             |
| Missing, N (%)                                | 144 (0.3%)                | 90 (0.4%)           | 54 (0.3%)         |             |
| <b>Diastolic Blood Pressure<br/>(mmHg)</b>    |                           |                     |                   | <0.001      |
| Mean (SD)                                     | 81.3 (9.98)               | 79.8 (9.92)         | 83.2 (9.74)       |             |
| Missing, N (%)                                | 144 (0.3%)                | 90 (0.4%)           | 54 (0.3%)         |             |
| <b>Glycated Haemoglobin<br/>(mmol/mol)</b>    |                           |                     |                   | <0.001      |
| Mean (SD)                                     | 35.6 (5.79)               | 35.3 (5.19)         | 35.8 (6.44)       |             |
| Missing, N (%)                                | 5127 (11.9%)              | 2938 (12.3%)        | 2189 (11.5%)      |             |
| <b>High-Density<br/>Lipoprotein (mmol/L)</b>  |                           |                     |                   | <0.001      |
| Mean (SD)                                     | 1.49 (0.387)              | 1.63 (0.382)        | 1.31 (0.312)      |             |
| Missing, N (%)                                | 5742 (13.3%)              | 3383 (14.1%)        | 2359 (12.3%)      |             |

| Characteristic                              | Whole Sample<br>(N=43029) | Female<br>(N=23917) | Male<br>(N=19112) | P-<br>value |
|---------------------------------------------|---------------------------|---------------------|-------------------|-------------|
| <b>Low-Density Lipoprotein<br/>(mmol/L)</b> |                           |                     |                   | <0.001      |
| Mean (SD)                                   | 3.55 (0.852)              | 3.59 (0.853)        | 3.51 (0.849)      |             |
| Missing, N (%)                              | 3677 (8.5%)               | 2117 (8.9%)         | 1560 (8.2%)       |             |
| <b>Diabetes, N (%)</b>                      |                           |                     |                   | <0.001      |
| No                                          | 41205 (95.8%)             | 23141 (96.8%)       | 18064<br>(94.5%)  |             |
| Yes                                         | 1589 (3.7%)               | 662 (2.8%)          | 927 (4.9%)        |             |
| Missing                                     | 235 (0.5%)                | 114 (0.5%)          | 121 (0.6%)        |             |
| <b>CVD, N (%)</b>                           |                           |                     |                   | <0.001      |
| No                                          | 32024 (74.4%)             | 18709 (78.2%)       | 13315<br>(69.7%)  |             |
| Yes                                         | 10813 (25.1%)             | 5097 (21.3%)        | 5716 (29.9%)      |             |
| Missing                                     | 192 (0.4%)                | 111 (0.5%)          | 81 (0.4%)         |             |

Notes: SD: standard deviation; N, number; CVD, Cardiovascular Disease

Table 2. Bidirectional Mendelian Randomization

| Exposure | Outcome | Method     | NSNPs | Standardized Effect Size (95% CI) | P-value |
|----------|---------|------------|-------|-----------------------------------|---------|
| VD       | ISOS+PS | Wald ratio | 1     | 1.50 (1.07, 1.93)                 | <0.001  |
| VD       | GCL     | Wald ratio | 1     | 0.50 (0.10, 0.89)                 | 0.015   |
| VD       | OPL     | Wald ratio | 1     | 0.57 (0.37, 0.78)                 | <0.001  |
| OPL      | VD      | IVW        | 3     | 0.45 (0.16, 0.75)                 | 0.002   |
| GCC      | VD      | IVW        | 2     | 0.27 (0.12, 0.41)                 | <0.001  |
| ISOS+PS  | VD      | IVW        | 2     | 0.28 (0.20, 0.35)                 | <0.001  |
| GCL      | VD      | IVW        | 3     | 0.40 (0.06, 0.75)                 | 0.019   |
| INL      | VD      | Wald ratio | 1     | 0.39 (0.32, 0.46)                 | <0.001  |
| IPL      | VD      | IVW        | 2     | 0.43 (-0.02, 0.87)                | 0.06    |
| GCL      | FD      | IVW        | 2     | 0.44 (0.29, 0.58)                 | <0.001  |
| INL      | FD      | Wald ratio | 1     | 0.25 (0.18, 0.32)                 | <0.001  |
| GCC      | FD      | Wald ratio | 1     | 0.32 (0.19, 0.46)                 | <0.001  |
| IPL      | FD      | Wald ratio | 1     | 0.44 (0.32, 0.56)                 | <0.001  |
| OPL      | FD      | Wald ratio | 1     | 0.48 (0.35, 0.61)                 | <0.001  |

Notes: SNP, single nucleotide polymorphism; NSNPs, number of SNPs; VD, Vessel Density; FD, Fractal Dimension; OPL, outer plexiform layer; GCC, ganglion cell complex; ISOS, inner segment/outer segment; PS photoreceptor segments; GCL, ganglion cell layer; INL, inner nuclear layer; GCC included RNFL, GCL, and inner plexiform layer. ISOS+PS included external limiting membrane-ISOS + ISOS-retinal pigment epithelium; IVW, Inverse variance weighted. When only one SNP was identified for each pair of exposure and outcome, the Wald ratio was used, while if more than one was identified, then IVW was used. The standardized effect size was calculated to represent the change in the outcome variable (in SD units) for a one-unit change in the exposure variable.
